1 **Ancestral state reconstruction suggests repeated losses of**  
2 **recruitment communication during ant evolution (Hymenoptera:**  
3 **Formicidae)**

4

5 Simone M Glaser<sup>1</sup> and Christoph Grüter<sup>1,2</sup>

6 <sup>1</sup> Institute of Organismic and Molecular Evolutionary Biology, Johannes-Gutenberg  
7 University of Mainz, Germany

8 <sup>2</sup> Present address: School of Biological Sciences, University of Bristol, 24 Tyndall  
9 Avenue, BS8 1TQ Bristol, UK

10 **Correspondence:** [simone-glaser1@gmx.de](mailto:simone-glaser1@gmx.de)

11

12 **Acknowledgement**

13 We thank the Department of Behavioural Ecology and Social Evolution, Johannes  
14 Gutenberg-University Mainz for feedback and advice. C.G. and S.M.G. were funded  
15 by the German Research Foundation (DFG: GR 4986/1-1).

16

17 **Author contributions**

18 S.M.G and C.G. developed the study question. S.M.G. performed the literature  
19 research, analyzed the data and wrote the primarily manuscript. S.M.G and C.G.  
20 contributed critically to the drafts and gave final approval for publication.

21

22

23 **Abstract**

24 Eusocial insects have evolved different strategies to share information about their  
25 environment and workers can recruit nestmates to food sources or new nest sites. Ants  
26 are the most species-rich social insect group and are known to use pheromones, visual  
27 and tactile signals to communicate and inform nestmates about resources. However,  
28 how these different strategies evolved and whether there was a predominant  
29 evolutionary sequence that led to present day recruitment strategies is not well  
30 understood. In our study we explored two competing hypotheses about the ancestral  
31 recruitment communication: (1) ant ancestors did not recruit nestmates and species  
32 evolved more complex recruitment strategies over time vs. (2) early ants used mass-  
33 recruitment, which was lost repeatedly in some lineages. We combined an extensive  
34 search of the scientific literature and ancestral state reconstruction to estimate the  
35 ancestral recruitment strategy, focusing on the categories (i) no recruitment, (ii) tandem  
36 running, (iii) group-recruitment and (iv) chemical mass-recruitment. Stochastic  
37 character mapping suggests that mass-recruitment was ancestral in ants (59-61%),  
38 whereas “no recruitment” was unlikely to be the ancestral condition (21%). Similarly,  
39 marginal ancestral state reconstruction suggests that mass-recruitment (44-81%) or  
40 group-recruitment (48-50%) represented the original state. Our results are consistent  
41 with the finding that early ants lived in colonies containing up to several thousand  
42 individuals, which are typically associated with mass-recruiting in ants. However, our  
43 ability to robustly identify patterns in the evolution of communication in ants remains  
44 hampered by a lack of natural history information for most ant species.

45

46 **Keywords:** ancestral state, communication, Formicidae, recruitment, tandem running

47

## 48 **Introduction**

49 Communication about resources is widespread in social insects and different species  
50 have evolved a variety of strategies to communicate with other individuals (Czaczkes  
51 et al., 2015; Franklin, 2014; Grüter & Leadbeater, 2014; Hölldobler & Wilson, 1990;  
52 Leadbeater & Chittka, 2007; von Frisch, 1967; Wilson, 1971; Grüter, 2020). Senders  
53 can use visual, tactile (body contact in honeybees, Grooters, 1987; antennation,  
54 Hölldobler & Wilson, 1990; von Frisch, 1967) or chemical (e.g. pheromones, Czaczkes  
55 et al., 2015; Hölldobler & Wilson, 1990) signals to share information about food  
56 locations, nesting locations, dangers or the needs of individuals and the colony.

57 Ants (Family: Formicidae) are an extraordinarily diverse, widespread and  
58 ecologically important group of social insects, containing over 13,000 extant species  
59 (Reeves & Moreau, 2019). Ants probably first appeared in the early Cretaceous, more  
60 than 100 million years ago, most likely from a lineage of wasps (Hölldobler & Wilson  
61 2009; Moreau et al., 2006; Ward, 2014). Ants have evolved a variety of different  
62 communication strategies, some of which are behaviourally highly complex  
63 (Hölldobler, 1999). There are also species that employ several strategies during  
64 recruitment (see below).

65 Several classification systems for recruitment behaviours have been proposed  
66 (Beckers et al., 1989; Jaffe, 1984; Lanan, 2014). The most common strategies are the  
67 use of pheromone trails (Czaczkes et al., 2015; Hölldobler & Wilson, 1990, 2009),  
68 group-recruitment (Hölldobler, 1971; Liefke et al., 2001), tandem recruitment (Franklin,  
69 2014; Glaser & Grüter, 2018; Grüter et al., 2018) or no recruitment at all  
70 (solitary/individual) (Beckers et al., 1989; Jaffe, 1984). In tandem recruitment, a scout  
71 with knowledge of a valuable resource recruits a single nestmate to that resource. The  
72 follower maintains contact with the leader by antennating the gaster and hind legs of

73 the leader. In group-recruitment, a scout leads a group of up to thirty nestmates to a  
74 resource (Beckers et al. 1989; Liefke et al., 2001). A short-lived, volatile pheromone  
75 emitted by the leader helps recruited ants stay close to the leader (Möglich et al., 1974).  
76 In mass-recruitment, successful scouts lay pheromone trails between the nest and the  
77 resource, which is followed and strengthened by nestmates. Some species use a  
78 particular strategy in one context but not in another. For example, *Neoponera* or  
79 *Diacamma* species perform tandem runs when they relocate to a new nest site, but  
80 when they are foraging for prey they do so solitarily (Fresneau, 1985; Kaur et al., 2017).  
81 Furthermore, recruitment communication can depend on the type of food source that  
82 is collected. When collecting small prey, ants often do not recruit nestmates as they  
83 can carry home the food item by themselves, but use recruitment communication when  
84 finding larger resources, like honey dew-secreting aphid colonies or large prey items  
85 (Czaczkes et al., 2011; Czaczkes & Ratnieks, 2012; Detrain & Deneubourg, 2008;  
86 Lach, 2005). These examples highlight that the use of recruitment communication  
87 often depends on the ecological context.

88 Species with small colonies (<1000 individuals) often do not use recruitment or they  
89 perform tandem runs, whereas medium size colonies (up to a few thousand individuals)  
90 tend to recruit nestmates by group-recruitment or by pheromone trails and large  
91 colonies use mainly pheromone trails (Beckers et al., 1989). Recruitment *via*  
92 pheromone trails requires colonies to have a minimum number of foragers to deposit  
93 pheromones in order to maintain the trail (Beekman et al., 2001). The link between  
94 colony size and recruitment strategy is not rigid, however, and species with similar  
95 colony sizes can differ in the strategies they employ (Beckers et al., 1989).

96 This diversity in recruitment strategies raises the question how these strategies  
97 evolved and whether certain forms of recruitment tend to precede other methods. One

98 hypothesis is that recruitment communication increased in complexity over  
99 evolutionary time. According to this scenario, early ants would have foraged solitarily,  
100 like many present-day ponerine ants (Beckers et al., 1989; Maschwitz & Schönegge,  
101 1983; Villet, 1990). Subsequently, small-scale communication mechanisms evolved,  
102 like tandem-running and group-recruitment. From these forms of communication,  
103 mass-recruitment with longer-lasting chemical trails may have evolved (Beckers et al.,  
104 1989; Hölldobler & Wilson, 1990; Traniello, 1989). Hingston (1929) and Wilson (1959),  
105 for instance, suggested that tandem running is an ancestral form of communication  
106 that was used by early ants. Short-lived pheromones released by the tandem leader  
107 play a potentially important role for the cohesion between the leader and follower in a  
108 tandem run (Basari et al., 2014). It would then have been a small evolutionary step to  
109 produce longer lasting trail pheromones that allowed mass-recruitment in species with  
110 larger colony sizes. The hypothesis of an increase in scale – from small-scale to large-  
111 scale recruitment – has recently been supported by Reeves & Moreau (2019) who  
112 suggest solitary foraging as the ancestral recruitment strategy.

113 A phylogenetic analysis by Burchill & Moreau (2016), on the other hand, suggested  
114 that early ant species had medium colony sizes, with colonies containing up to several  
115 thousand individuals, which is typically associated with mass-recruitment in extant ants  
116 (Beckers et al., 1989). This suggests that mass-recruitment may have been a more  
117 likely strategy used by early ants. Following this argument, recruitment would have  
118 been lost over time in some lineages as ant species with small colony sizes evolved  
119 (Burchill & Moreau 2016). The antiquity of tandem running has also been questioned  
120 by the fact that this behaviour is found in species that are considered more derived,  
121 such as in *Temnothorax* and *Leptothorax* (Planque et al. 2010). This suggests that  
122 tandem running may be a derived behaviour, at least in some groups.

123 The main aim of our study was to estimate the ancestral state of recruitment  
124 communication of the Formicidae. While Reeves & Moreau (2019) focused on  
125 recruitment communication during foraging, we also considered whether species use  
126 recruitment during emigrations. We included these cases because numerous ant  
127 species do not communicate during foraging but use recruitment communication in  
128 other ecological situations (Fresneau, 1985; Grüter et al., 2018; Kaur et al., 2017). The  
129 value of communication in foraging depends on the foraging ecology of a species, such  
130 as the kind of food that is exploited and food source distribution (Anna Dornhaus et al.,  
131 2006; l'Anson Price et al., 2019; Sherman & Visscher, 2002). Thus, the strategies used  
132 during foraging reflect foraging ecology and provide an incomplete picture of the  
133 recruitment strategies used by a species. To better understand the evolution of  
134 recruitment communication mechanisms, it is instructive to consider whether a species  
135 uses recruitment communication, irrespective of the type of resource that is exploited.  
136 In addition, we explored whether tandem running was indeed an early recruitment  
137 strategy that preceded group- and mass-recruitment (Hingston, 1929; Wilson, 1959).

138

## 139 **Material & Methods**

### 140 *Literature research for recruitment strategies*

141 Data were collected on the recruitment strategies used by extant ant species *via* an  
142 extensive search of the published scientific literature (from October 2019 to March  
143 2020). For many ant species, information about recruitment was collected from reviews  
144 or articles about recruitment (Beckers et al., 1989; Jaffe, 1984; Silvestre et al., 1999).  
145 Furthermore, we searched in Google Scholar using the search terms (ant species or  
146 genus in combination with “recruit”, “forag”, “prey”, “individual”, “solitary”, “tandem”,  
147 “group”, “trail”, “pheromone”). We included species-level information when the

148 recruitment strategy was described based on observations or collected in controlled  
149 experiments. Data were coded as discrete character traits. Each species was allocated  
150 to one of four different recruitment strategies, similar to Jaffé (1984), Beckers et al.  
151 (1989) and Lanan (2014): no recruitment, tandem running, group-recruitment and  
152 mass-recruitment (Table 1). Reeves & Moreau (2019) found that the different  
153 classification systems led to very similar outcomes in their ancestral state  
154 reconstruction.

**Table 1.** Recruitment classifications and definitions, largely based on Jaffé (1984).

| <b>Recruitment strategy</b> | <b>Definition</b>                                                                                                                                                                                                      |
|-----------------------------|------------------------------------------------------------------------------------------------------------------------------------------------------------------------------------------------------------------------|
| <b>Solitary/individual</b>  | No recruitment, no information transfer between nestmates                                                                                                                                                              |
| <b>Tandem running</b>       | A single ant (scout) attracts a single nestmate using antennal contact and then physically leads a nestmate to the goal. Physical contact is often maintained between scout and nestmate, chemical signals may be used |
| <b>Group-recruitment</b>    | A scout recruits “up to thirty nestmates” and leads them to the goal. Chemical signals are often used for short-distance attraction but physical contact between scout and the group is also used                      |
| <b>Mass-recruitment</b>     | Groups are guided via chemical trails alone. Large numbers of ants can be recruited by a small number of recruiters. Chemical trails are laid on the substrate.                                                        |

155  
156 The literature search highlighted that there is a relative scarcity of detailed information  
157 about foraging strategies in the ant literature (see also Reeves & Moreau 2019). There  
158 are numerous examples of studies that mention recruitment of nestmates, but without  
159 providing details of the strategy and the context when this was observed. These studies  
160 were not included in our analysis. If possible, we also collected and compared the  
161 recruitment data to Reeves and Moreau (2019), who collected data on ant foraging  
162 strategies. In some cases, we were unable to recover the information from the cited  
163 primary literature (e.g. *Buniapone amblyops*, *Mayaponera constricta* or *Megaponera*

164  *analis*). *Tetramorium caespitum* uses both group and mass-recruitment (Collignon &  
165 Detrain, 2010). We considered this to be a mass-recruiting species for our analysis.  
166 Additionally, we used a subset that included only ant species that perform tandem runs  
167 and analysed if recruitment to nest sites or food sources was more likely to be the  
168 ancestral state.

169

#### 170 *Phylogenetic comparative methods*

171 We modified the phylogenetic tree of Branstetter et al. (2017), which contains ~1000  
172 ant species and is a phylogram based on molecular data. In our literature research we  
173 found information for 161 species, 82 genera and 11 sub-families (Table S1) that were  
174 also present in the phylogenetic tree. Overall, the species included in our study  
175 represent 25% of genera and 65% of sub-families. Species with no recruitment data  
176 available were removed from the dataset with the *drop.tip* function in the R package  
177 “ape” (Paradis & Schliep, 2019).

178 We performed marginal ancestral state reconstructions (ASR) for the dataset, using  
179 the functions *fitMk* and *ace* from the R package “phytools” (Revell, 2012) and “ape”  
180 (Paradis & Schliep, 2019) to estimate the transition rates and the ancestral states for  
181 our tested character using a maximum likelihood (ML) approach. The *fitMk* function  
182 assumes that the probability to change from one state to another depends only on the  
183 current state and not on the state that has come before. Furthermore, every character  
184 state is equally likely to change to one of the other states. The *ace* function utilizes  
185 marginal reconstruction and returns the marginal ancestral state likelihood of all nodes  
186 within a phylogeny.

187 Additionally, we performed a stochastic character mapping (SCM) by using  
188 *make.simmap* from the R package “phytools”. For the stochastic reconstructions of  
189 character states we used an MCMC approach, to explore the posterior probabilities of



190 all nodes and provided the number of changes between the character states (1000  
191 simulations performed).

192 Three commonly used transition rate models were analysed for the ancestral state  
193 reconstructions: “equal rates” (ER), “symmetrical rates” (SYM) and “all rates different”  
194 (ARD) with names referring to transition rates between each state. We used the Akaike  
195 information criterion (AIC) values corrected for small sample sizes (AICc values) for  
196 the three transition rates. We calculated the AIC-weights which standardize the AIC  
197 scores of the fitted models and measured the relative weight of evidence for the three  
198 models used in our data (Harmon, 2019). We visualized the results by mapping the  
199 ancestral state on the phylogeny with the function *plotTree*.

200

## 201 **Results**

### 202 *Evolution of recruitment strategy*

203 The ancestral state reconstruction results were mapped to our phylogeny (Fig. 1). The  
204 log-likelihood values, AIC values, AICc values and the number of free parameters per  
205 model are presented in Table 2. We compared the AIC and AICc values, which  
206 revealed that simple ER models were inferior and, thus, were rejected. A “symmetric  
207 model” and “all-rates-different model” best explained our transition between  
208 recruitment states. Thus, both transition models were used to analyse the ancestral  
209 state of recruitment strategies in ants.

210





213 **Figure 1.** Ant phylogeny including recruitment strategy and **(A)** marginal ancestral  
214 state reconstruction or **(B)** stochastic character mapping. Nodes provide estimates  
215 based on Markov chain models. The phylogeny is based on Branstetter et al. (2017).  
216

**Table 2.** Results of the transition rate models. Log likelihoods, Akaike information criterion values, number of free parameters and Akaike-weights are shown.

| Model | LogL   | AIC   | AICc  | free parameters | AICcW |
|-------|--------|-------|-------|-----------------|-------|
| ER    | -170.0 | 336.9 | 342.0 | 1               | 0.03  |
| SYM   | -161.4 | 331.6 | 335.4 | 6               | 0.45  |
| ARD   | -155.7 | 331.4 | 337.6 | 12              | 0.52  |

217  
218 Marginal ancestral state reconstruction analyses and stochastic character mapping  
219 both suggest that mass-recruitment is the most probable strategy at the root of the  
220 phylogeny (71.2% and 60.2%, respectively) (Table 3). Also, internal nodes (lineage  
221 splitting events) were dominated by high probabilities for the mass-recruitment  
222 category. Mass-recruitment was the most likely ancestral state in both the Poneroids  
223 and the Formicoids (Figure 1). The stochastic character mapping revealed that there  
224 were an estimated 81.3 changes between recruitment strategies (Table 4). The most  
225 common transitions were from mass-recruitment to solitary/individual behaviour  
226 (33.7%) or to group-recruitment (18.5%) (Figure 2). Furthermore, there were  
227 transitions from no recruitment to tandem running (14.8%) or mass-recruitment  
228 (12.7%). Tandem running evolved several times independently in the subfamilies  
229 Ponerinae, Pseudomyrmecinae, Formicinae and Myrmecinae. Furthermore, it seems  
230 that recruitment was lost at least once in all subfamilies, except in the Dorylinae (army  
231 ants). Similarly, we found group-recruitment in nearly all included sub-families, except  
232 in the Paraponerinae. The Myrmeciinae were the only group without species that  
233 perform mass-recruitment.

**Table 3.** Ancestral character estimation using marginal ancestral state reconstruction and stochastic character mapping. Values represent likelihoods of recruitment strategies at the root.

|            | Character states  | Scaled root likelihood (fitMk) | Scaled root likelihood (ace) | Stochastic charac mapping (make.simmap) |
|------------|-------------------|--------------------------------|------------------------------|-----------------------------------------|
| <b>SYM</b> | No recruitment    | 0.15                           | 0.16                         | 0.21                                    |
|            | Tandem running    | 0.01                           | 0.01                         | 0.10                                    |
|            | Group-recruitment | 0.02                           | 0.02                         | 0.07                                    |
|            | Mass-recruitment  | 0.81                           | 0.81                         | 0.61                                    |
| <b>ARD</b> | No recruitment    | 0.05                           | 0.06                         | 0.21                                    |
|            | Tandem running    | 0.01                           | 0.01                         | 0.09                                    |
|            | Group-recruitment | 0.50                           | 0.48                         | 0.12                                    |
|            | Mass-recruitment  | 0.44                           | 0.45                         | 0.59                                    |

234

**Table 4.** Changes from stochastic character mapping. GR = group-recruitment, MS = mass-recruitment, NR = no recruitment, TR = tandem running

|                      | <b>SYM</b> |            | <b>ARD</b> |            |
|----------------------|------------|------------|------------|------------|
| <b>Total changes</b> | 75.783     |            | 104.472    |            |
| <b>Type</b>          | Number     | Percentage | Number     | Percentage |
| <b>GR → MS</b>       | 3.44       | 4.5%       | 32.013     | 30.6%      |
| <b>GR → NR</b>       | 0.595      | 0.7%       | 0          | 0%         |
| <b>GR → TR</b>       | 1.224      | 1.6%       | 0          | 0%         |
| <b>MS → GR</b>       | 14.902     | 19.7%      | 23.572     | 22.6%      |
| <b>MS → NR</b>       | 26.57      | 35.1%      | 27.514     | 26.3%      |
| <b>MS → TR</b>       | 0.489      | 0.6%       | 0.952      | 0.9%       |
| <b>NR → GR</b>       | 1.412      | 1.9%       | 7.409      | 7.1%       |
| <b>NR → MS</b>       | 10.061     | 13.3%      | 0          | 0%         |
| <b>NR → TR</b>       | 9.8        | 12.9%      | 9.572      | 9.2%       |

|                |       |      |      |      |
|----------------|-------|------|------|------|
| <b>TR → GR</b> | 2.626 | 3.4% | 3.44 | 3.3% |
| <b>TR → MS</b> | 0.117 | 0.2% | 0    | 0%   |
| <b>TR → NR</b> | 4.547 | 6.0% | 0    | 0%   |

235

A) SYM model

B) ARD model

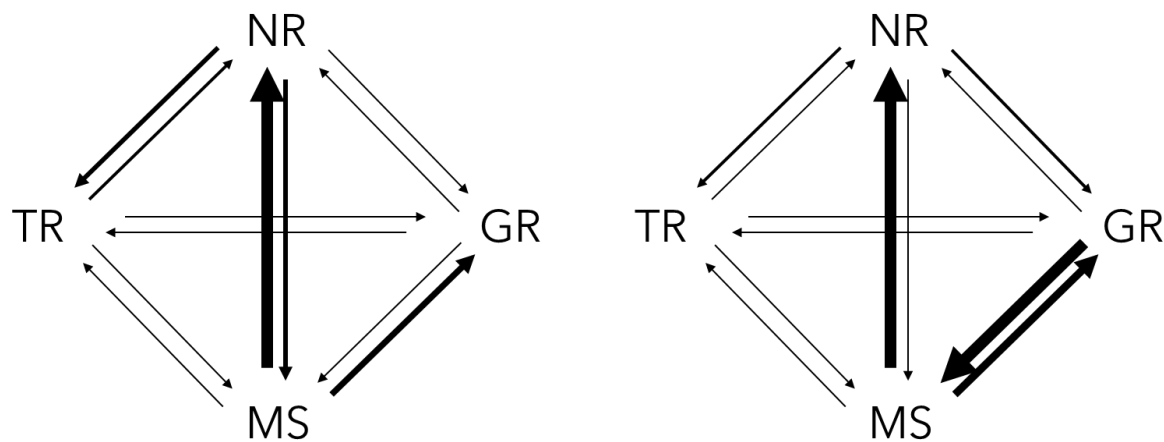

236

237 **Figure 2.** Transitions between states from stochastic character mapping for the  
 238 methods SYM and ARD. The thickness of the arrow reflects the relative commonness  
 239 of a transition. GR = group-recruitment, MS = mass-recruitment, NR = no recruitment,  
 240 TR = tandem running  
 241

## 242 *Evolution of tandem running*

243 Twenty-one species included in our study perform tandem runs. For some species it is  
 244 not known if they recruit to food sources and during nest relocations. For other species  
 245 it is known that they perform tandem runs to new nest sites, but forage solitarily for  
 246 food sources (*Neoponera*, *Diacamma* or *Paltothyreus*) (Table S1).

247 After mapping the recruitment strategy onto the phylogenetic tree (Figure 3), we found  
 248 that all species that can perform tandem runs do so during colony emigrations to new  
 249 nest sites. Several species (43%) that use recruitment via tandem running do not do  
 250 so during foraging.

251

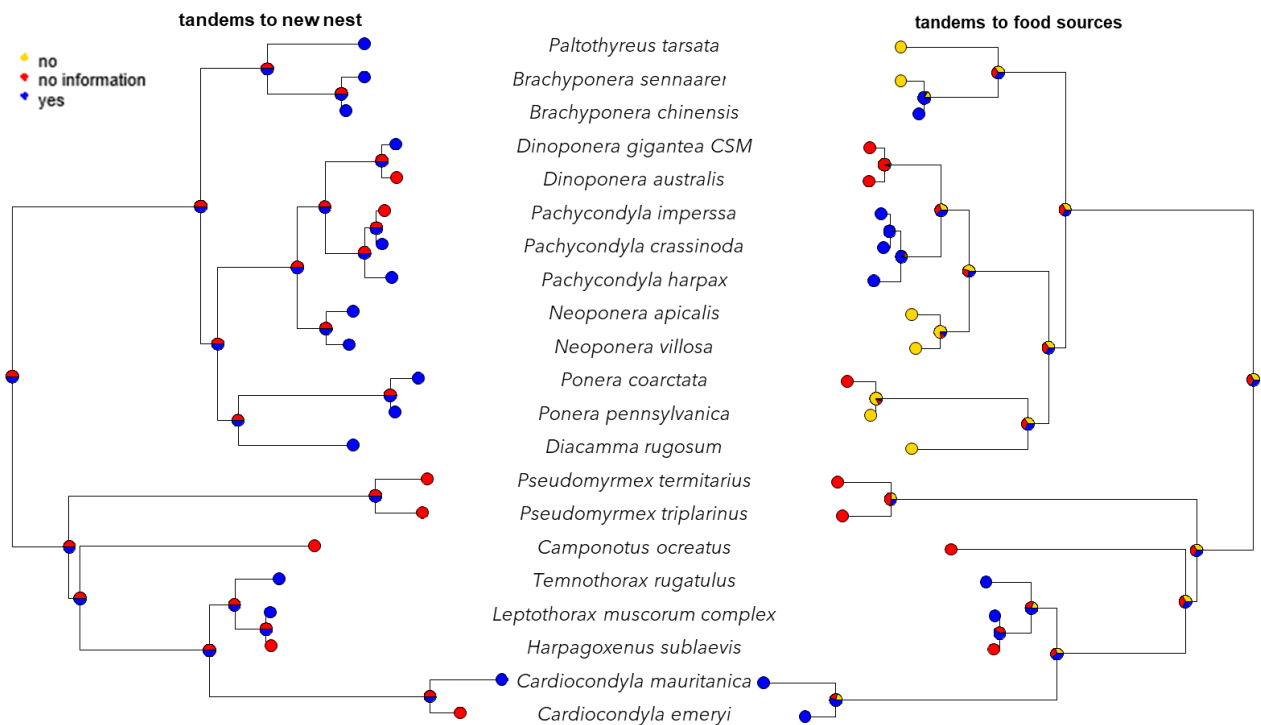

252

253 Figure 3. Ancestral state reconstruction for ant species that perform tandem running to  
254 either new nest sites, food sources or both. Nodes provide estimates based on Markov  
255 chain models.

256

## 257 Discussion

258 Our ancestral state analyses indicate that mass-recruitment or group-recruitment were  
259 likely used for recruitment by the last common ancestor of present-day ants. During  
260 the course of their evolutionary history, all included subfamilies show switches from  
261 mass-recruitment to other recruitment strategies. Strikingly, most transitions occurred  
262 from mass recruitment to group or no recruitment. The repeated loss of communication  
263 seems puzzling, but probably coincided with the emergence of lineages with small  
264 colony sizes (e.g. in Amblyoponinae, Myrmeciinae, Ponerinae, Pseudomyrmecinae)  
265 (Burchill & Moreau 2016), where communication is less beneficial (Beckers et al.  
266 1989). Transitions between mass- and group-recruitment were also more frequent than  
267 between tandem running and no recruitment. Tandem running evolved independently

268 in 4 of 11 subfamilies. Furthermore, there were several transitions from no recruitment  
269 to tandem running or mass-recruitment. These findings highlight that recruitment  
270 strategies are an evolutionarily flexible and reversible trait.

271 Many lineages appear to have lost the ability to recruit nestmates. The putative  
272 loss of chemical mass-recruitment seems puzzling at first, but could be explained by  
273 the constraints of living in a small colony (Beckers et al., 1989; Dornhaus et al., 2012)  
274 and/or a switch to a diet or foraging strategy that does not require pheromone trails.  
275 Smaller colonies tend to exploit resources solitarily or they use tandem running. One  
276 reason could be that smaller colonies do not have sufficiently large colonies to maintain  
277 pheromone trails (Beckers et al., 1989; Beekman et al., 2001; Planqué et al., 2010). A  
278 recent study has suggested that the ancestral Formicidae had medium colony sizes  
279 containing up to several thousand individuals (Burchill & Moreau, 2016). These  
280 findings in combination with the findings that medium sized colonies often use group  
281 or mass-recruitment (Beckers et al. 1989) are consistent with our results that the best-  
282 supported ancestral recruitment strategy was mass- or group-recruitment.

283 Another reason for the loss of mass-recruitment could be that recruitment by  
284 pheromone trails can have disadvantages in changing foraging landscapes.  
285 Pheromone trails can persist for relatively long periods (up to several hours), which  
286 can make it difficult for the colony to re-allocate workers to a newly available higher-  
287 quality resource due to the strong positive feedback created by a pheromone trail  
288 (Beckers et al., 1989; Grüter et al. 2012; Czaczkes et al., 2015; l'Anson Price et al.,  
289 2016). This makes recruitment less flexible and colonies are more likely to miss out on  
290 new food sources when the environment changes.

291 Reeves & Moreau (2019) found evidence that solitary foraging, rather than mass  
292 recruitment, represented the original state in terms of recruitment strategies. Our and



293 their results are not necessarily contradictory. In our study, we considered whether a  
294 species uses recruitment communication during colony emigrations and/or during  
295 foraging. It is well known that foraging strategies in ants strongly depend on the  
296 foraging ecology (Davidson, 1977; Dejean et al., 2012; Dornhaus et al., 2006;  
297 Hölldobler & Wilson, 1990; Lanan, 2014). For example, in many ant species, foragers  
298 follow a solitary foraging strategy when collecting insect prey, but they use recruitment  
299 communication when the colony emigrates to a new nest-site (Lanan, 2014). In other  
300 words, these species possess the ability to recruit, but foragers do not perform  
301 recruitment because this would not be an adaptive strategy given their foraging  
302 ecology.

303         The observation that numerous species recruit to new nest sites, but do not use  
304 recruitment communication during foraging (e.g. *Neoponera* or *Diacamma* species,  
305 Fresneau, 1985; Grüter et al., 2018) raises the question if recruitment communication  
306 evolved first to help colonies during emigrations rather than to communicate the  
307 location of food sources, as has also been suggested in the case of the honeybee  
308 waggle dance (Beekman et al. 2008; l'Anson Price & Grüter, 2015). This seems  
309 plausible given that during nest relocations of cavity nesting species, nest locations  
310 have to be communicated very precisely. If the old nest is damaged or destroyed, a  
311 fast and precise relocation is critical (Dornhaus et al., 2004; Franks et al., 2003). During  
312 foraging, on the other hand, communication might often be less important. Especially  
313 when food sources are abundant and evenly distributed, communication might not  
314 provide benefits or even be disadvantageous due to time costs (Dechaume-  
315 Moncharmont et al., 2005; Dornhaus et al., 2006; Goy et al., 2021; l'Anson Price et al.,  
316 2019). The hypothesis that recruitment evolved first in colony emigrations and was co-  
317 opted by some species in a foraging context is also supported by our results suggesting

318 group- or mass-recruitment as the ancestral state and those of Reeves & Moreau  
319 (2019) who suggested solitary foraging as the ancestral condition.

320 It has been suggested that tandem running is a “primitive” recruitment strategy  
321 (*i.e.* ancestral) (Hingston 1929; Hölldobler et al., 1974; Schultheiss et al., 2015; Wilson,  
322 1959). Our results do not support this view. We found that tandem running evolved  
323 repeatedly and independently in the subfamilies Ponerinae, Pseudomyrmecinae,  
324 Formicinae and Myrmecinae. Transitions to tandem running occurred most often from  
325 no recruitment and, more rarely, from mass or group-recruitment. One benefit of  
326 tandem running is that it allows small colonies to defend resources against competitors  
327 when competition for nest sites or food sources is intense (Glaser et al., 2021).

328 In summary, our results suggest that mass or group-recruitment were the most  
329 likely recruitment strategies used by the last common ancestor of present-day ants.  
330 There were repeated, independent transitions to different strategies, such as tandem  
331 running or no recruitment, but also transitions back to group or mass-recruitment. It  
332 should be noted that our analysis is restricted to a small proportion of ant species and  
333 we currently lack information about recruitment behaviours for the majority of species  
334 (see also Reeves & Moreau 2019). We echo the call of Reeves & Moreau (2019) to  
335 pay more attention to ant behaviour and ecology as this will allow us to better  
336 understand the links between different traits of ant behaviour, ecology and natural  
337 history.

338

### 339 **References**

340 Basari, N., & Laird-Hopkins, B. (2014). Trail laying during tandem-running recruitment  
341 in the ant *Temnothorax albipennis*. *Naturwissenschaften*, 101(7), 549–556.  
342 <https://doi.org/10.1007/s00114-014-1191-1>

- 343 Beckers, R., Goss, S., Deneubourg, J. L., & Pasteels, J. M. (1989). Colony size,  
344 communication and ant foraging strategy. *Psyche: A Journal of Entomology*, 96(3–  
345 4), 239–256. <https://doi.org/10.1155/1989/94279>
- 346 Beekman, M., Sumpter, D. J. T., & Ratnieks, F. L. W. (2001). Phase transition between  
347 disordered and ordered foraging in Pharaoh ' s ants. *PNAS*, 98(17), 9703–9706.
- 348 Burchill, A. T., & Moreau, C. S. (2016). Colony size evolution in ants:  
349 macroevolutionary trends. *Insectes Sociaux*, 63(2), 291–298.  
350 <https://doi.org/10.1007/s00040-016-0465-3>
- 351 Collignon, B., & Detrain, C. (2010). Distributed leadership and adaptive decision-  
352 making in the ant *Tetramorium caespitum*. *Proceedings of the Royal Society B:*  
353 *Biological Sciences*, 277(1685), 1267–1273.  
354 <https://doi.org/10.1098/rspb.2009.1976>
- 355 Czaczkes, T. J., Grüter, C., & Ratnieks, F. L. W. (2015). Trail pheromones: An  
356 integrative view of their role in social insect colony organization. *Annual Review of*  
357 *Entomology*, 60(1), 581–599. [https://doi.org/10.1146/annurev-ento-010814-](https://doi.org/10.1146/annurev-ento-010814-020627)  
358 [020627](https://doi.org/10.1146/annurev-ento-010814-020627)
- 359 Czaczkes, T. J., Nouvellet, P., & Ratnieks, F. L. W. (2011). Cooperative food transport  
360 in the Neotropical ant, *Pheidole oxyops*. *Insectes Sociaux*, 58(2), 153–161.  
361 <https://doi.org/10.1007/s00040-010-0130-1>
- 362 Czaczkes, T. J., & Ratnieks, F. L. W. (2012). Pheromone trails in the Brazilian ant  
363 *Pheidole oxyops*: extreme properties and dual recruitment action. *Behavioral*  
364 *Ecology and Sociobiology*, 66(8). <https://doi.org/10.1007/s00265-012-1367-7>
- 365 Davidson, D. W. (1977). Foraging ecology and community organization in desert seed-  
366 eating ants. *Ecology*, 58(4), 725–737.

- 367 Dechaume-Moncharmont, F. X., Dornhaus, A., Houston, A. I., McNamara, J. M.,  
368 Collins, E. J., & Franks, N. R. (2005). The hidden cost of information in collective  
369 foraging. *Proceedings of the Royal Society B: Biological Sciences*, 272(1573),  
370 1689–1695. <https://doi.org/10.1098/rspb.2005.3137>
- 371 Dejean, A., Delabie, J. H. C., Corbara, B., Azémar, F., Groc, S., Orivel, J., & Leponce,  
372 M. (2012). The ecology and feeding habits of the arboreal trap-jawed ant *Daceton*  
373 *armigerum*. *PLoS ONE*, 7(6). <https://doi.org/10.1371/journal.pone.0037683>
- 374 Detrain, C., & Deneubourg, J.-L. (2008). Collective decision-making and foraging  
375 patterns in ants and honeybees. *Advances in Insect Physiology*, 35, 123–173.
- 376 Dornhaus, A., Franks, N. R., Hawkins, R. M., & Shere, H. N. S. (2004). Ants move to  
377 improve: colonies of *Leptothorax albipennis* emigrate whenever they find a  
378 superior nest site. *Animal Behaviour*, 67(5), 959–963.  
379 <https://doi.org/10.1016/j.anbehav.2003.09.004>
- 380 Dornhaus, Anna, Klügl, F., Oechslein, C., Puppe, F., & Chittka, L. (2006). Benefits of  
381 recruitment in honey bees: effects of ecology and colony size in an individual-  
382 based model. *Behavioral Ecology*, 17(3), 336–344.  
383 <https://doi.org/10.1093/beheco/arj036>
- 384 Dornhaus, Anna, Powell, S., & Bengston, S. (2012). Group size and its effects on  
385 collective organization. *Annual Review of Entomology*, 57, 123–141.  
386 <https://doi.org/10.1146/annurev-ento-120710-100604>
- 387 Franklin, E. L. (2014). The journey of tandem running: the twists, turns and what we  
388 have learned. *Insectes Sociaux*, 61(1), 1–8. [https://doi.org/10.1007/s00040-013-](https://doi.org/10.1007/s00040-013-0325-3)  
389 [0325-3](https://doi.org/10.1007/s00040-013-0325-3)
- 390 Franks, N. R., Dornhaus, A., Fitzsimmons, J. P., & Stevens, M. (2003). Speed versus

- 391 accuracy in collective decision making. *Proceedings of the Royal Society B:*  
392 *Biological Sciences*, 270(1532), 2457–2463.  
393 <https://doi.org/10.1098/rspb.2003.2527>
- 394 Fresneau, D. (1985). Individual foraging and path fidelity in a ponerine ant. *Insectes*  
395 *Sociaux*, 32(2), 109–116. <https://doi.org/10.1007/BF02224226>
- 396 Glaser, S. M., & Grüter, C. (2018). Ants (*Temnothorax nylanderi*) adjust tandem  
397 running when food source distance exposes them to greater risks. *Behavioral*  
398 *Ecology and Sociobiology*, 72(3), 1–8. [https://doi.org/10.1007/s00265-018-2453-](https://doi.org/10.1007/s00265-018-2453-2)  
399 2
- 400 Glaser, S. M., Feitosa, R.M., Koch, A., Goss, N., Nascimento, F.S. & Grüter, C. (2021).  
401 Tandem communication improves ant foraging success in a highly competitive  
402 tropical environment. *Insectes Sociaux*, 68, 161–172.  
403 <https://doi.org/10.1007/s00040-021-00810-y>
- 404 Goy, N., Glaser, S. M., & Grüter, C. (2021). The adaptive value of tandem  
405 communication in ants: insights from an agent-based model. *Journal of*  
406 *Theoretical Biology*, 526, 110762.
- 407 Grooters, H. J. (1987). Influences of queen piping and worker behaviour on the timing  
408 of emergence of honey bee queens. *Insectes Sociaux*, 34(3), 181–193.  
409 <https://doi.org/10.1007/BF02224083>
- 410 Grüter, C., & Leadbeater, E. (2014). Insights from insects about adaptive social  
411 information use. *Trends Ecol. Evol.*, 29(3), 177–184.  
412 <https://doi.org/10.1016/j.tree.2014.01.004>
- 413 Grüter, C., Wüst, M., Cipriano, A. P., & Nascimento, F. S. (2018). Tandem recruitment  
414 and foraging in the ponerine ant *Pachycondyla harpax* (Fabricius). *Neotropical*

- 415 *Entomology*, 47(6), 742–749. <https://doi.org/10.5194/hess-16-3075-2012>
- 416 Grüter, C, Czaczkes, T. J., & Ratnieks, F. L. W. (2011). Decision making in ant foragers  
417 (*Lasius niger*) facing conflicting private and social information. *Behavioral Ecology*  
418 *and Sociobiology*, 65(2), 141–148. <https://doi.org/10.1007/s00265-010-1020-2>
- 419 Grüter, C., Schürch, R., Czaczkes, T. J., Taylor, K., Durance, T., Jones, S.M. &  
420 Ratnieks, F. L. W. (2012). Negative feedback enables fast and flexible collective  
421 decision-making in ants. *PLoS One*, 7(9), e44501.  
422 <https://doi.org/10.1371/journal.pone.0044501>
- 423 Grüter, Christoph. (2020). *Stingless Bees*. Springer International Publishing.
- 424 Harmon, L. J. (2019). *Phylogenetic Comparative Methods*.
- 425 Hingston, R. (1929). *Instinct and intelligence*. Macmillan.
- 426 Hölldobler, B. (1971). Recruitment behavior in *Camponotus socius* (Hym. Formicidae).  
427 *Zeitschrift Für Vergleichende Physiologie*, 75(2), 123–142.  
428 <https://doi.org/10.1007/BF00335259>
- 429 Hölldobler, B. (1999). Multimodal signals in ant communication. *J Comp Physiol A*,  
430 184(2), 129–141.
- 431 Hölldobler, B., Möglich, M., & Maschwitz, U. (1974). Communication by tandem  
432 running in the ant *Camponotus sericeus*. *Journal of Comparative Physiology*,  
433 90(2), 105–127. <https://doi.org/10.1007/BF00694481>
- 434 Hölldobler, B., & Wilson, E. O. (1990). *The Ants*. Harvard University Press, Springer-  
435 Verlag Berlin Heidelberg.
- 436 Hölldobler, B., & Wilson, E. O. (2009). *The Superorganism*. W. W. Norton & Company.
- 437 l’Anson Price, R., Dulex, N., Vial, N., Vincent, C., & Grüter, C. (2019). Honeybees

438 forage more successfully without the “dance language ” in challenging  
439 environments. *Science Advances*, 5(2). <https://doi.org/10.1126/sciadv.aat0450>

440 l’Anson Price, R., Grüter, C., Hughes, W. O. H., & Evison, S. E. F. (2016). Symmetry  
441 breaking in mass-recruiting ants: extent of foraging biases depends on resource  
442 quality. *Behavioral Ecology and Sociobiology*, 70(11), 1813–1820.  
443 <https://doi.org/10.1007/s00265-016-2187-y>

444 Jaffe, K. (1984). Negentropy and the evolution of chemical recruitment in ants  
445 (Hymenoptera: Formicidae). *Journal of Theoretical Biology*, 106(4), 587–604.  
446 [https://doi.org/10.1016/0022-5193\(84\)90009-2](https://doi.org/10.1016/0022-5193(84)90009-2)

447 Kaur, R., Joseph, J., Anoop, K., & Sumana, A. (2017). Characterization of recruitment  
448 through tandem running in an Indian queenless ant *Diacamma indicum*. *Royal*  
449 *Society Open Science*, 4(1), 160476. <https://doi.org/10.1098/rsos.160476>

450 Lach, L. (2005). Interference and exploitation competition of three nectar-thieving  
451 invasive ant species. *Insectes Sociaux*, 52(3), 257–262.  
452 <https://doi.org/10.1007/s00040-005-0807-z>

453 Lanan, M. C. (2014). Spatiotemporal resource distribution and foraging strategies of  
454 ants (Hymenoptera: Formicidae). *Myrmecological News*, 20(September), 53–70.  
455 <https://doi.org/10.1016/j.biotechadv.2011.08.021>.Secreted

456 Leadbeater, E., & Chittka, L. (2007). Social learning in insects - from miniature brains  
457 to consensus building. *Current Biology*, 17(16), 703–713.  
458 <https://doi.org/10.1016/j.cub.2007.06.012>

459 Liefke, C., Hölldobler, B., & Maschwitz, U. (2001). Recruitment behavior in the ant  
460 genus *Polyrhachis* (Hymenoptera, Formicidae). *Journal of Insect Behavior*, 14(5),  
461 637–657.

- 462 Maschwitz, U., & Schönege, P. (1983). Forage communication, nest moving  
463 recruitment, and prey specialization in the oriental ponerine *Leptogenys chinensis*.  
464 *Oecologia*, 57, 175–182.
- 465 Möglich, M., Maschwitz, U., & Hölldobler, B. (1974). Tandem calling: a new kind of  
466 signal in ant communication. *Science*, 186(4168), 1046–1047.
- 467 Moreau, C. S., Bell, C. D., Vila, R., Archibald, S. B., & Pierce, N. E. (2006). Phylogeny  
468 of the ants: Diversification in the age of angiosperms. *Science*, 312(5770), 101–  
469 104. <https://doi.org/10.1126/science.1124891>
- 470 Paradis, E., & Schliep, K. (2019). ape 5.0: an environment for modern phylogenetics  
471 and evolutionary analyses in R. *Bioinformatics*, 35(3), 526–528.  
472 <https://doi.org/10.1093/bioinformatics/bty633>
- 473 Planqué, R., van den Berg, J. B., & Franks, N. R. (2010). Recruitment strategies and  
474 colony size in ants. *PLoS ONE*, 5(8), e11664.  
475 <https://doi.org/10.1371/journal.pone.0011664>
- 476 Reeves, D. D., & Moreau, C. S. (2019). The evolution of foraging behavior in ants  
477 (Hymenoptera: Formicidae). *Arthropod Systematics and Phylogeny*, 77(2), 351–  
478 363. <https://doi.org/10.26049/ASP77-2-2019-10>
- 479 Revell, L. J. (2012). phytools: an R package for phylogenetic comparative biology (and  
480 other things). *Methods in Ecology and Evolution*, 3(2), 217–223.  
481 <https://doi.org/10.1111/j.2041-210X.2011.00169.x>
- 482 Schultheiss, P., Raderschall, C. A., & Narendra, A. (2015). Follower ants in a tandem  
483 pair are not always naïve. *Scientific Reports*, 5, 10747.  
484 <https://doi.org/10.1038/srep10747>
- 485 Sherman, G., & Visscher, P. K. (2002). Honeybee colonies achieve fitness through



- 486 dancing. *Nature*, 419(6910), 920–922. <https://doi.org/10.1038/nature01127>
- 487 Silvestre, R., Brandão, C. R. F., & Paiva, R. V. S. (1999). Ant guilds in the Brazilian  
488 “Cerrados.” *Ant Guilds in the Brazilian “Cerrados.”*  
489 <https://doi.org/10.13140/RG.2.2.22720.74246>
- 490 Traniello, J. F. A. (1989). Foraging strategies of ants. *Annual Review of Entomology*,  
491 34(1), 191–210. <https://doi.org/10.1146/annurev.ento.34.1.191>
- 492 Villet, M. H. (1990). Social organization of *Platythyrea lamellosa* (Roger)  
493 (Hymenoptera: Formicidae): II. Division of labour. *South African Journal of*  
494 *Zoology*, 25(4), 254–259. <https://doi.org/10.1080/02541858.1990.11448222>
- 495 von Frisch, K. (1967). *The dance language and orientation of bees*. Harvard University  
496 Press.
- 497 Ward, P. S. (2014). The phylogeny and evolution of ants. *Annual Review of Ecology,*  
498 *Evolution, and Systematics*, 45, 23–43. [https://doi.org/10.1146/annurev-ecolsys-](https://doi.org/10.1146/annurev-ecolsys-120213-091824)  
499 [120213-091824](https://doi.org/10.1146/annurev-ecolsys-120213-091824)
- 500 Wilson, E. O. (1959). Communication by tandem running in the ant genus  
501 *Cardiocondyla*. *Psyche*, 66(3), 29–34.
- 502 Wilson, E. O. (1971). *The insect societies*. Belknap Press of Harvard University Press.
- 503
